# Supplementary material
Source: PubMed Central journal article supplement (PMC2995812)

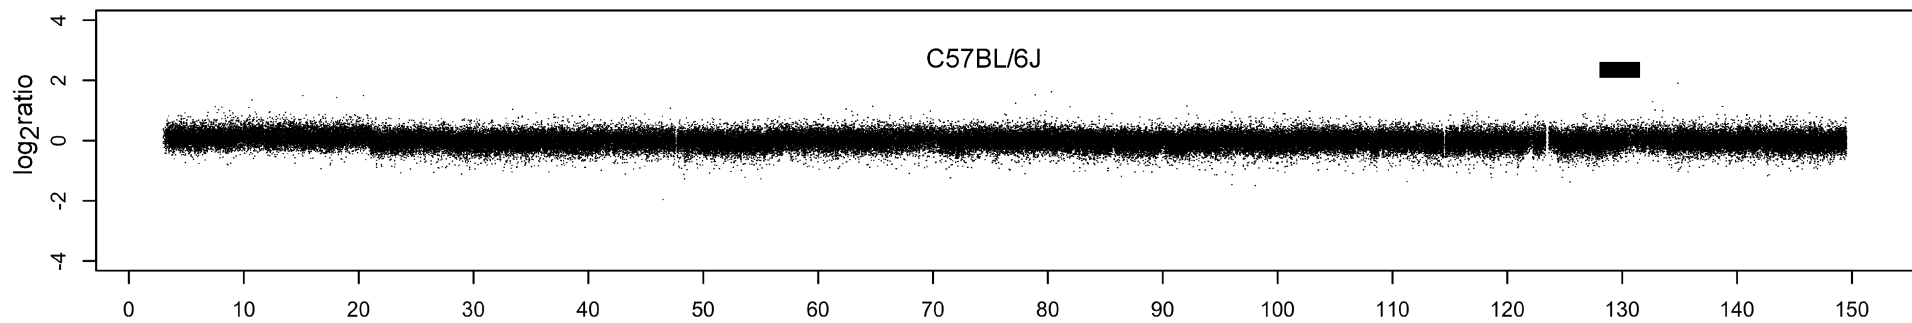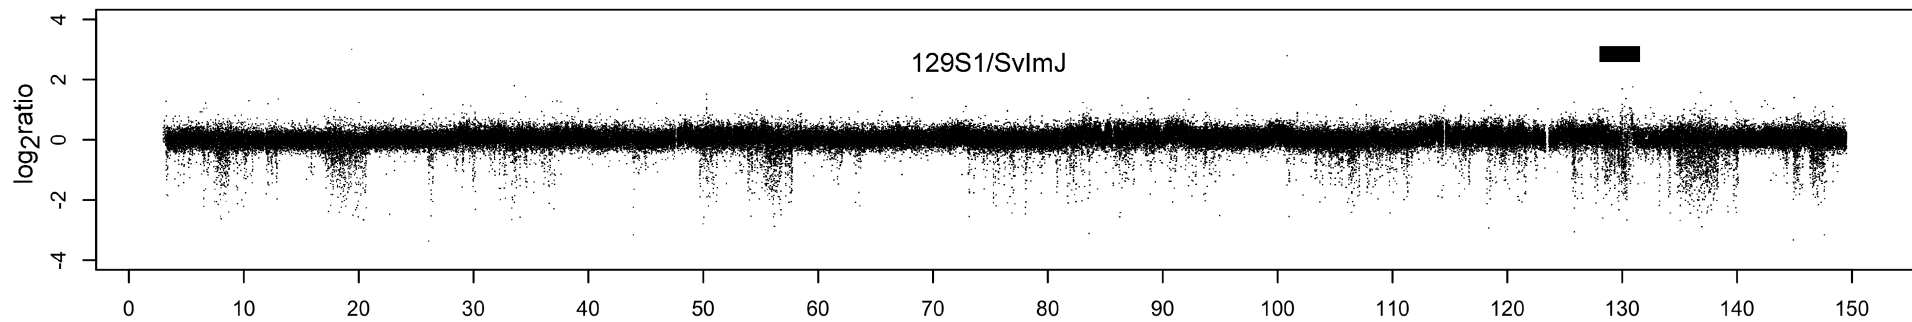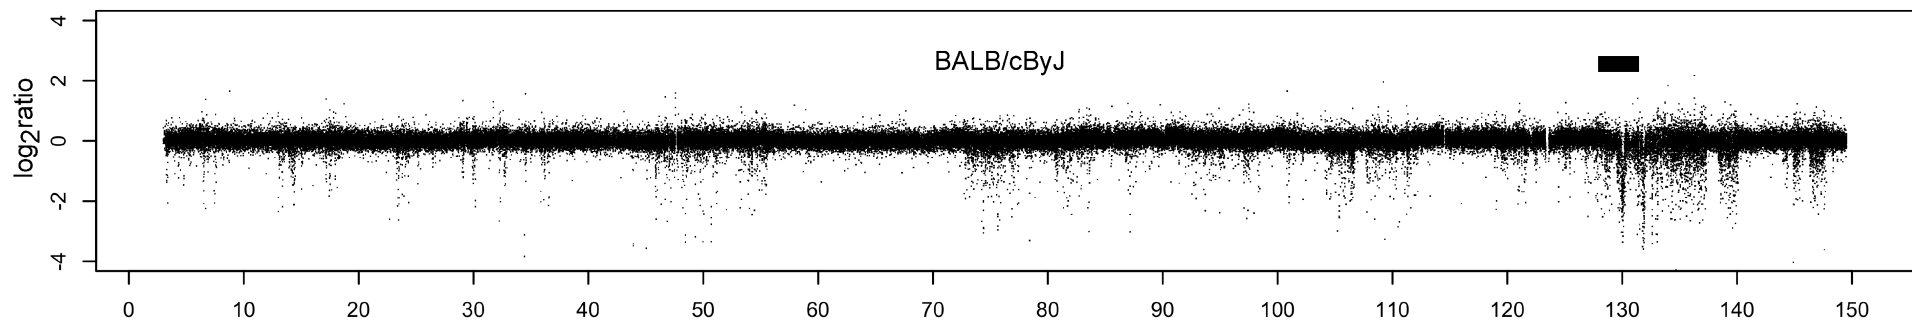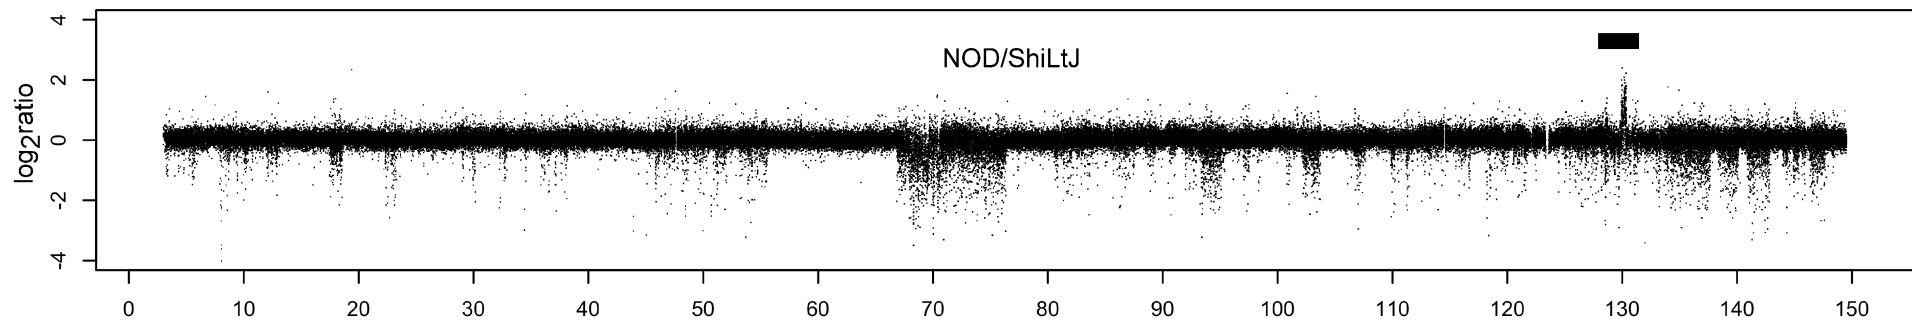

Chromosome 6 position in mb

Supplement: NIHMS215228-supplement-2.pdf [file NIHMS215228-supplement-2.pdf]

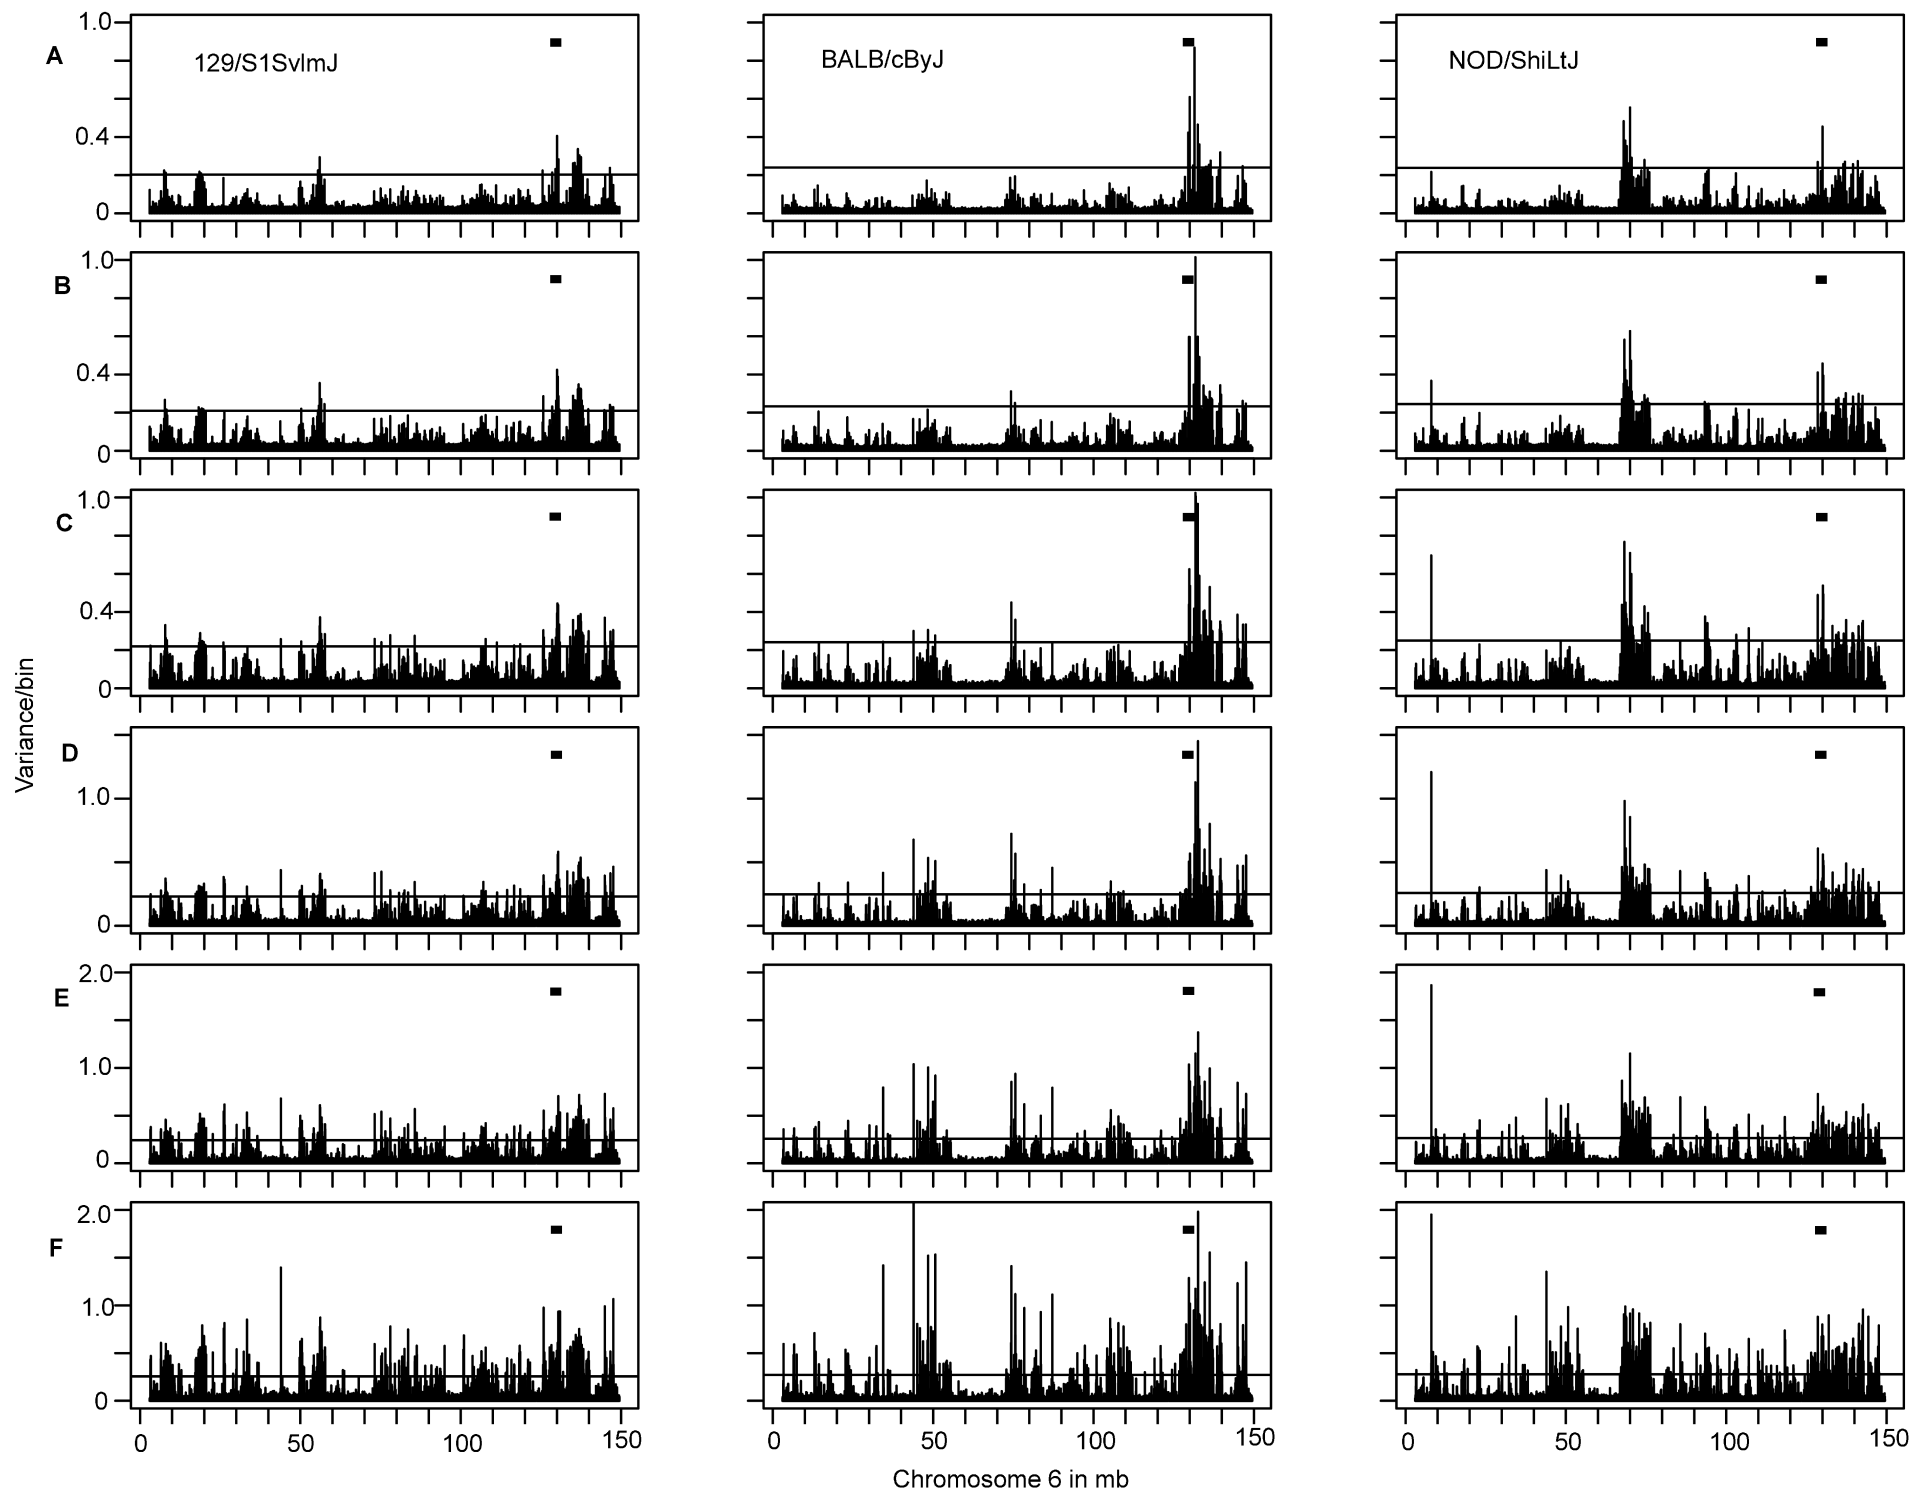

Supplement: NIHMS215228-supplement-3.pdf [file NIHMS215228-supplement-3.pdf]

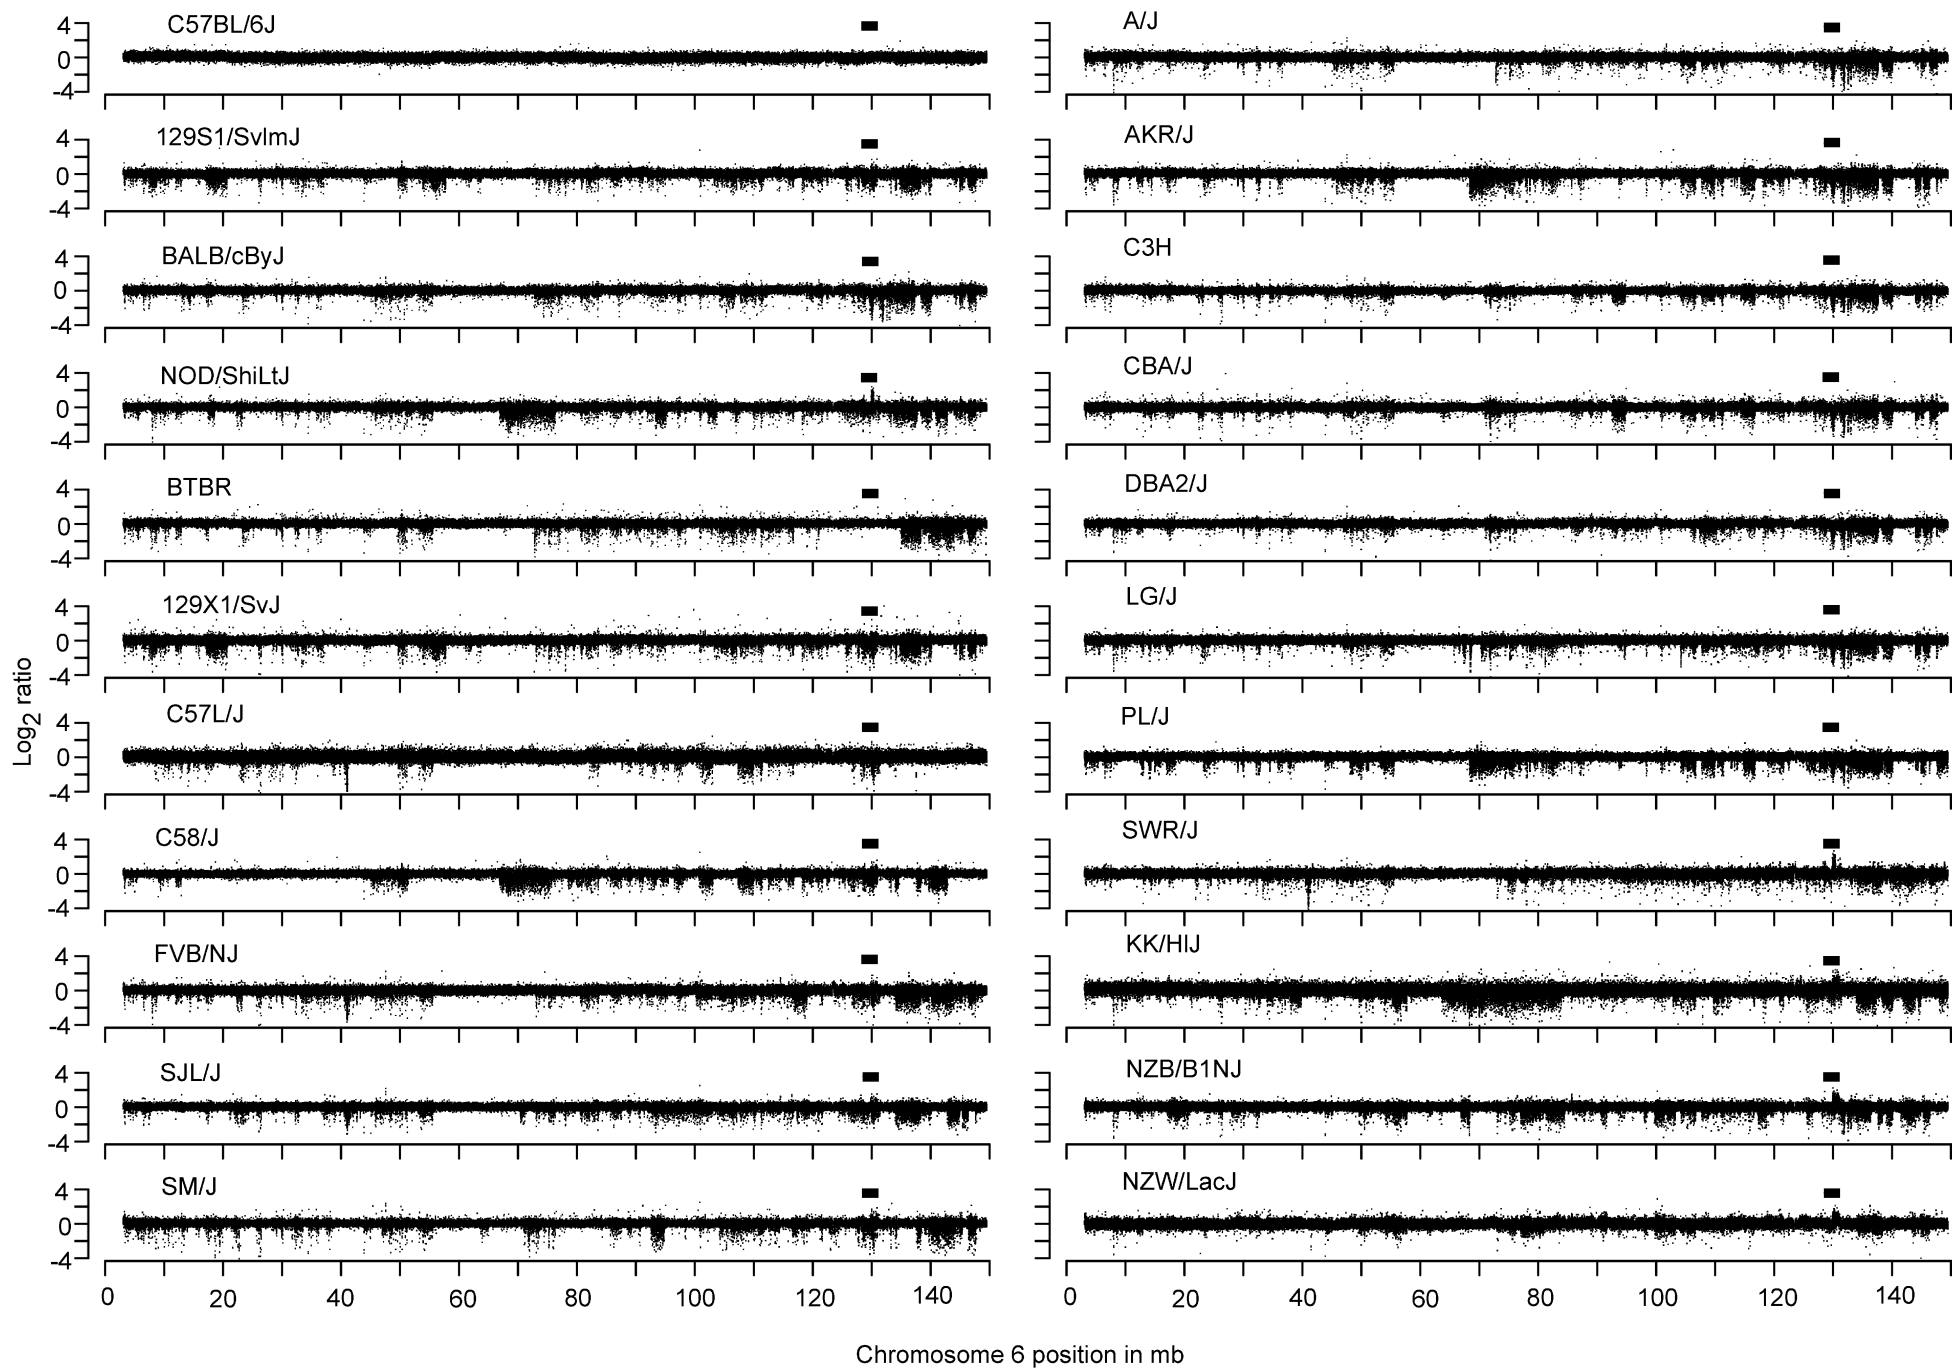

Supplement: NIHMS215228-supplement-4.pdf [file NIHMS215228-supplement-4.pdf]

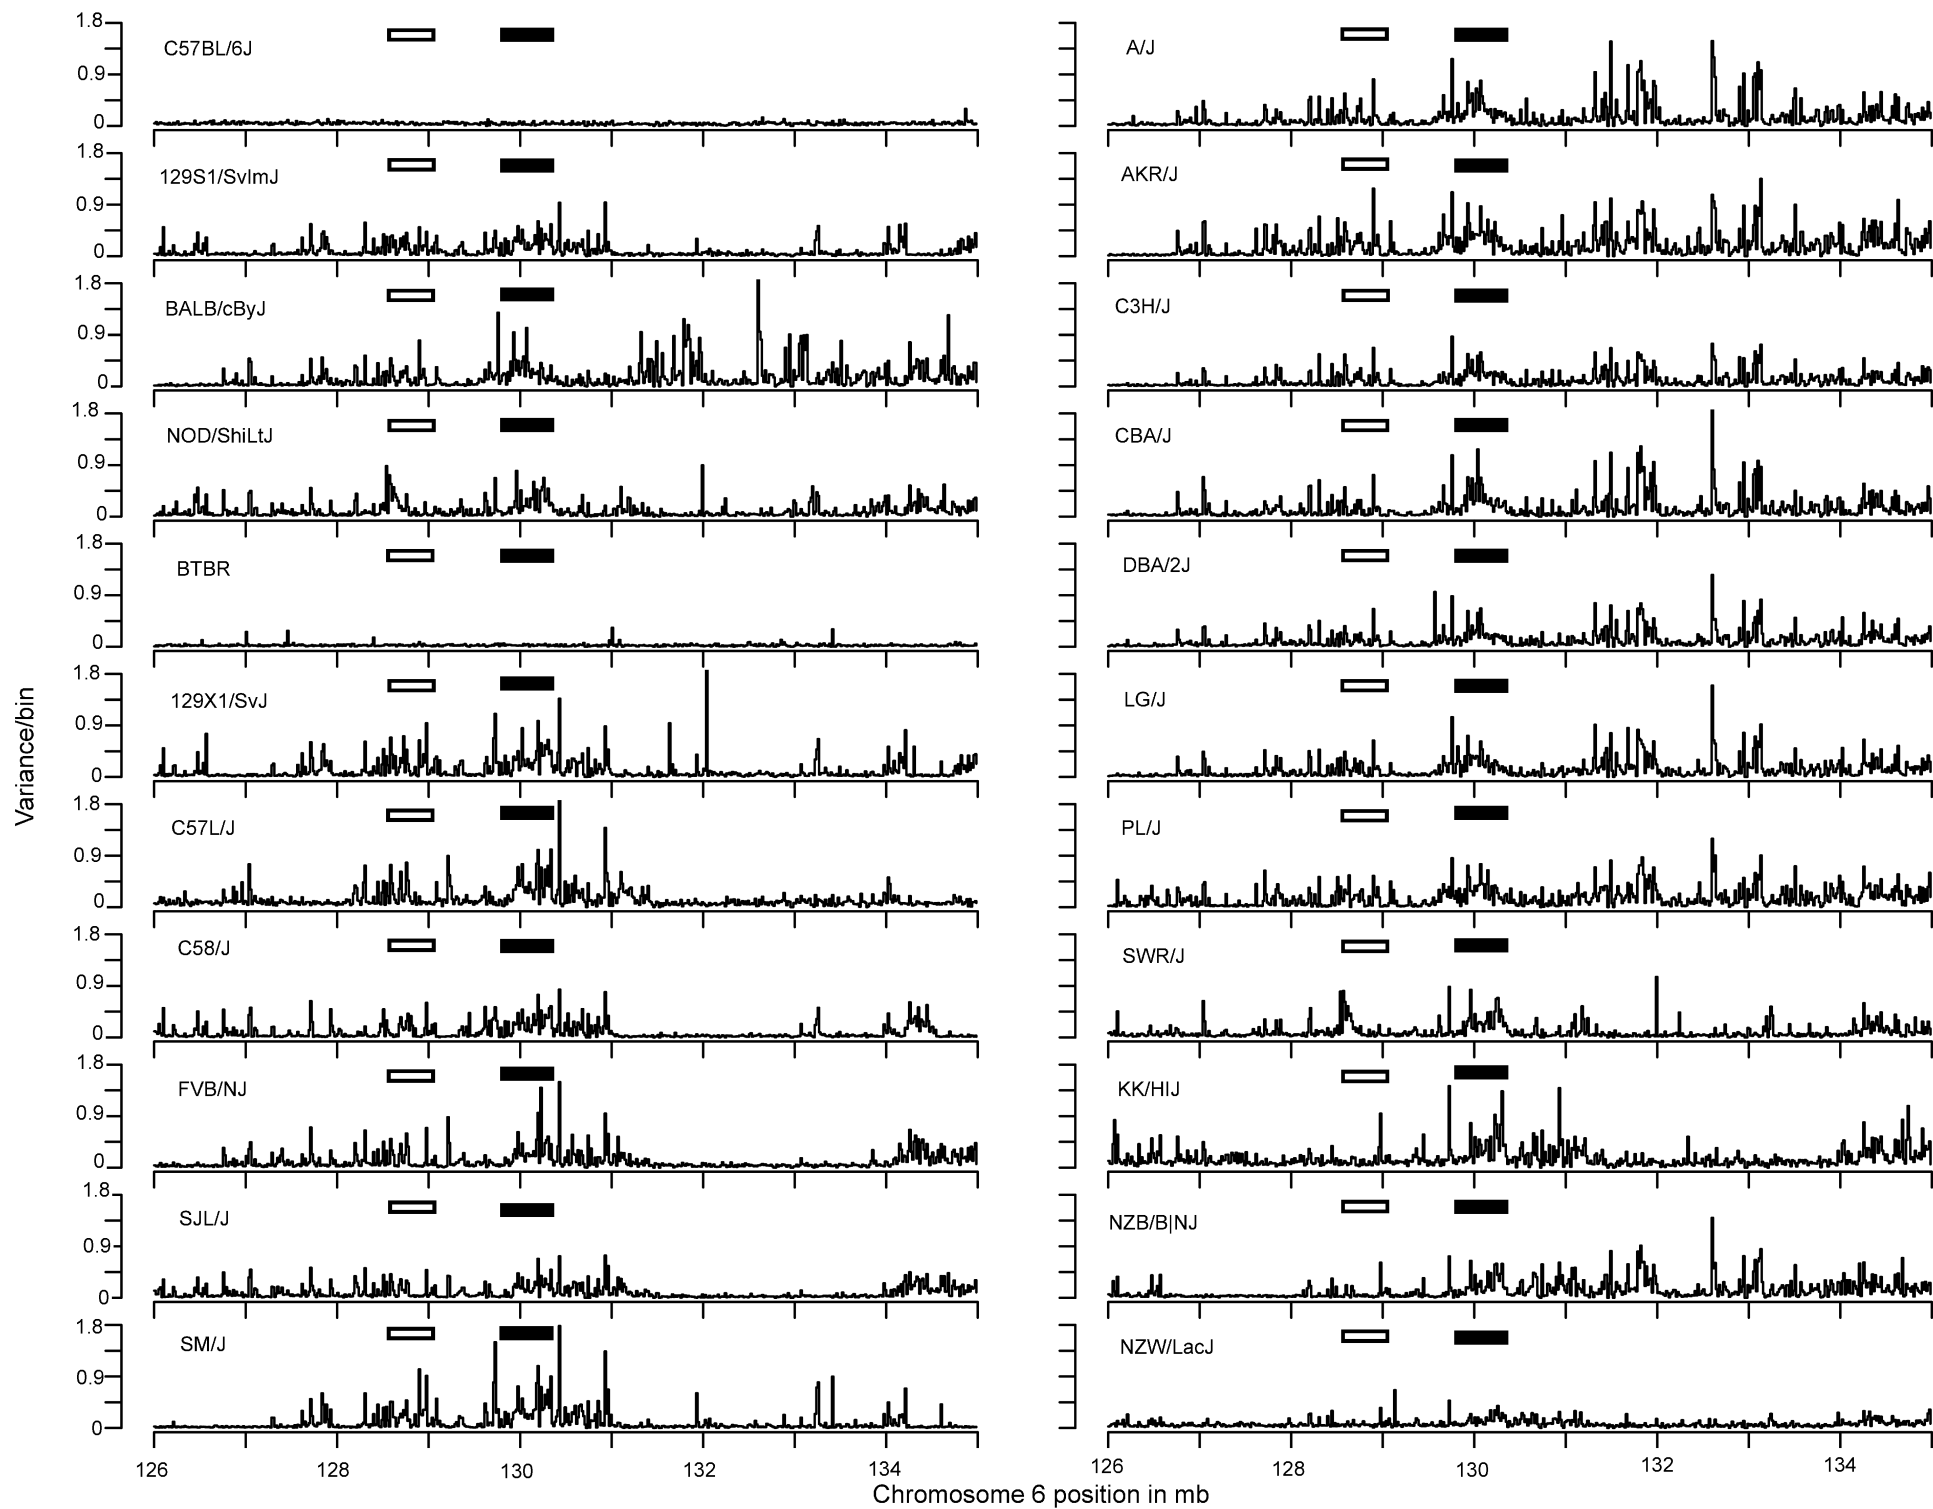

Supplement: NIHMS215228-supplement-5.pdf [file NIHMS215228-supplement-5.pdf]

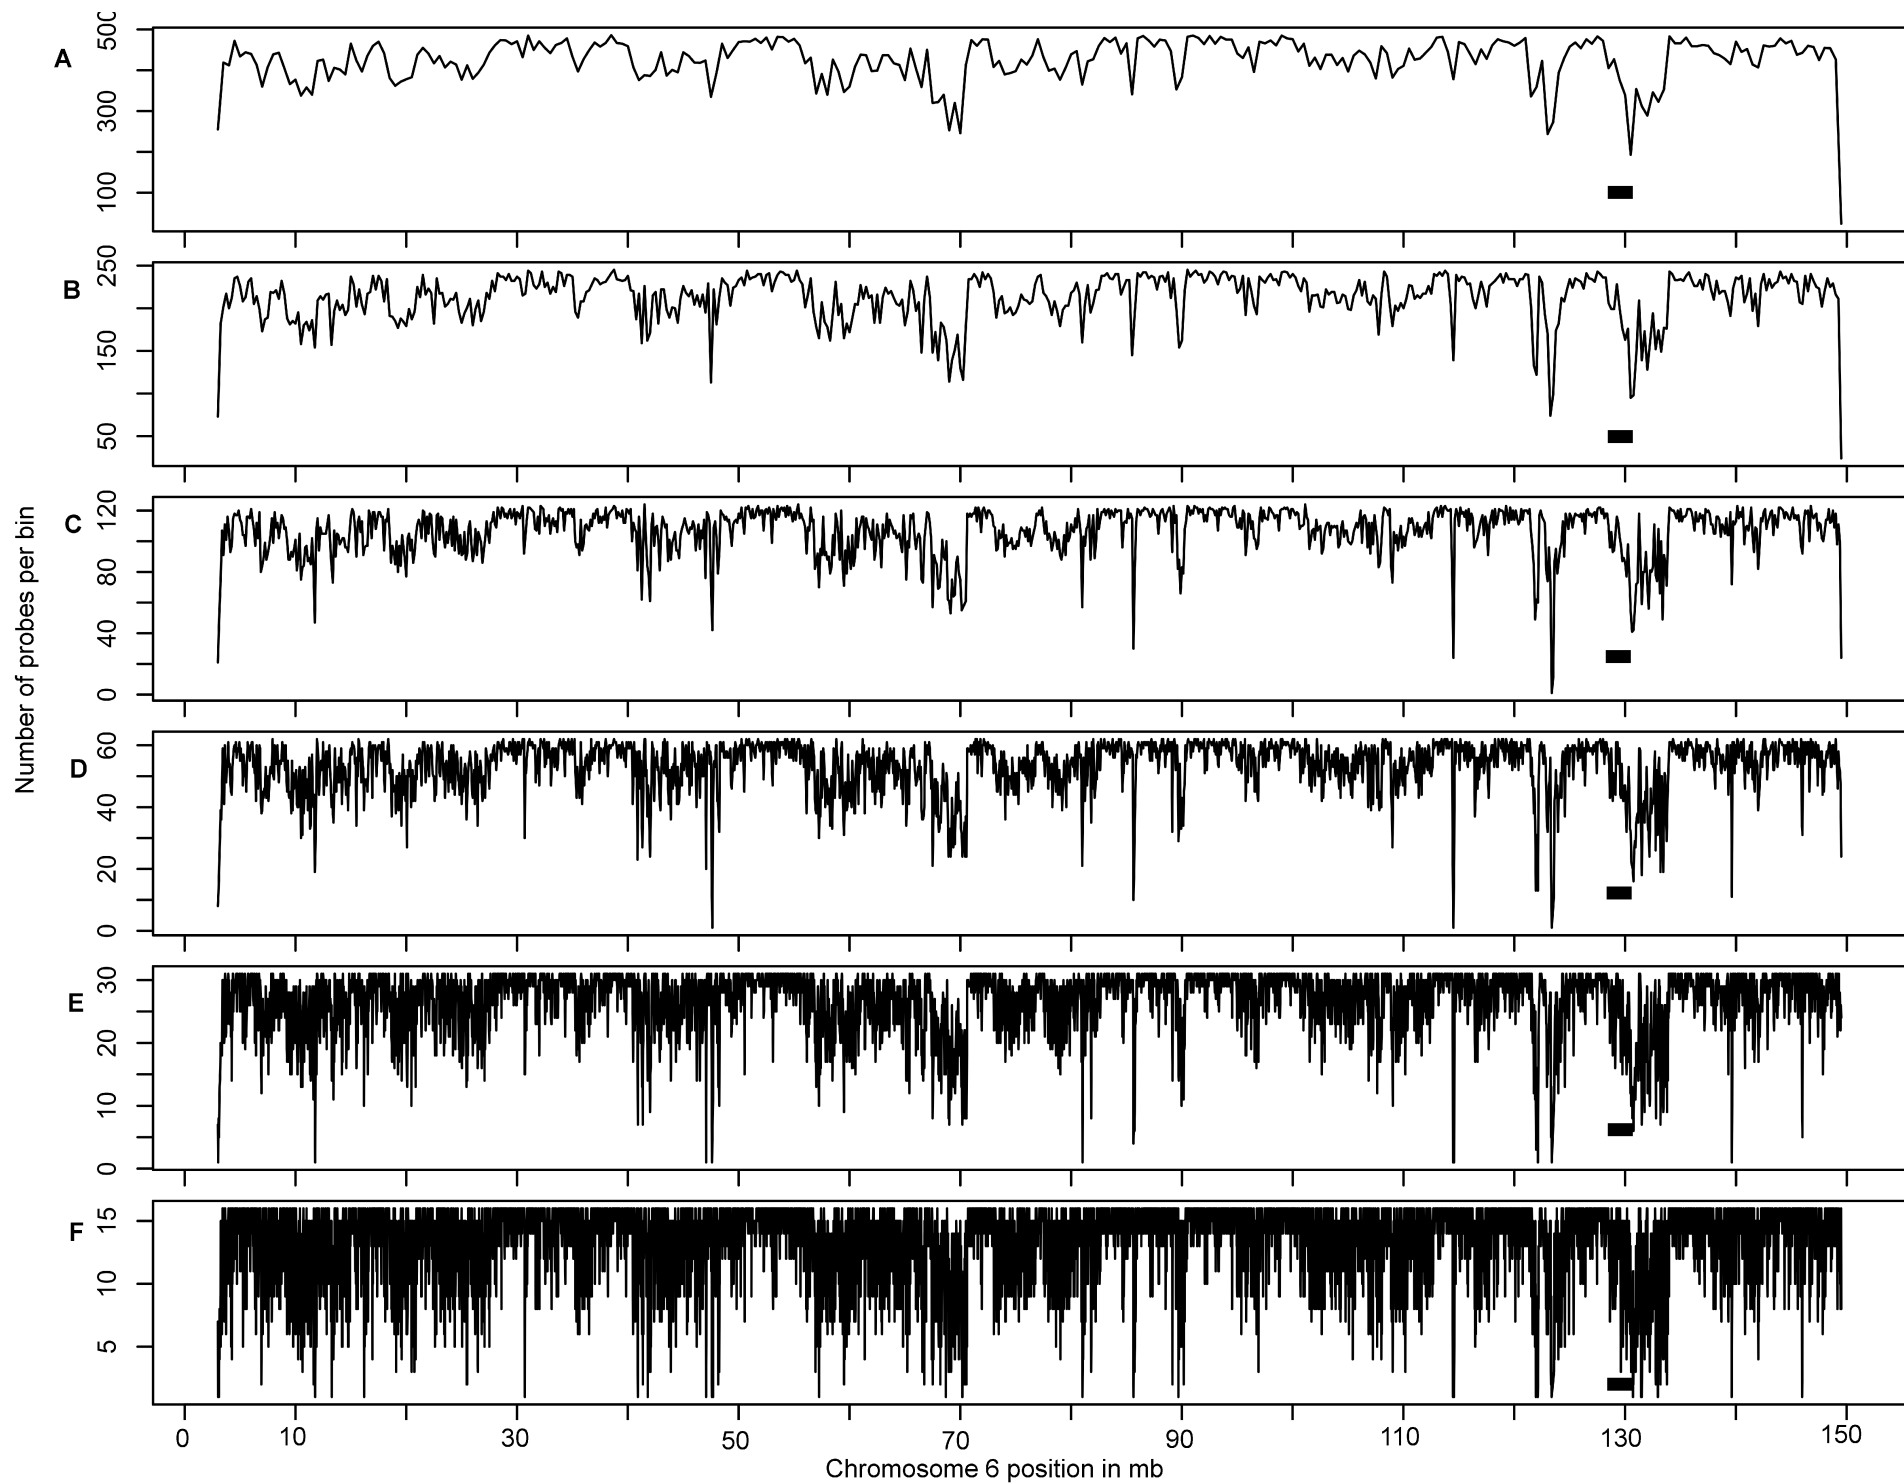

Supplement: NIHMS215228-supplement-6.pdf [file NIHMS215228-supplement-6.pdf]

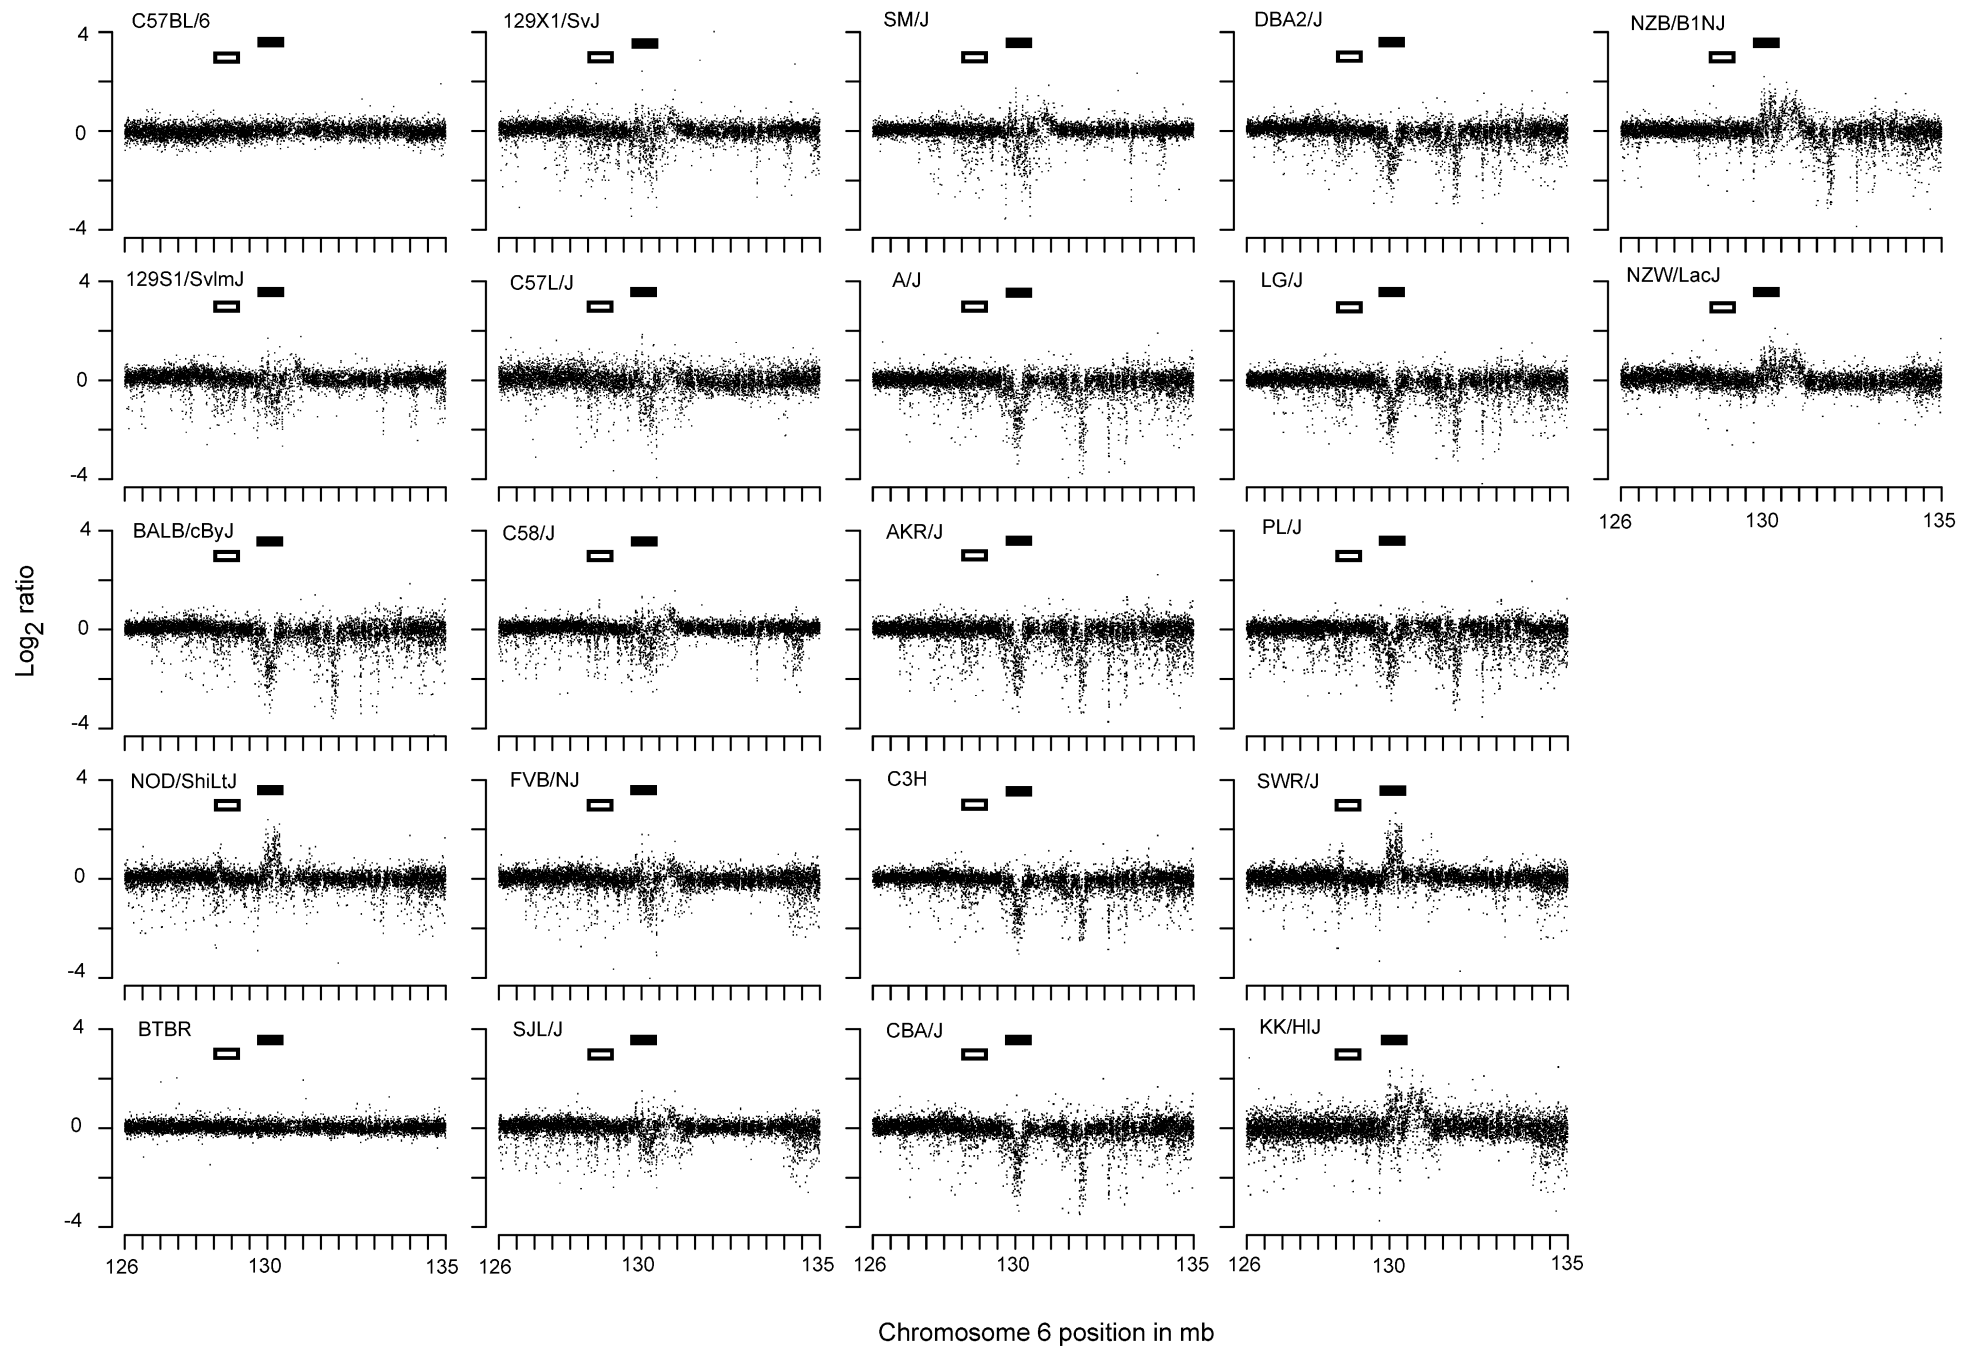

Chromosome 6 position in mb

Supplement: NIHMS215228-supplement-7.pdf [file NIHMS215228-supplement-7.pdf]

Ly49 region

A

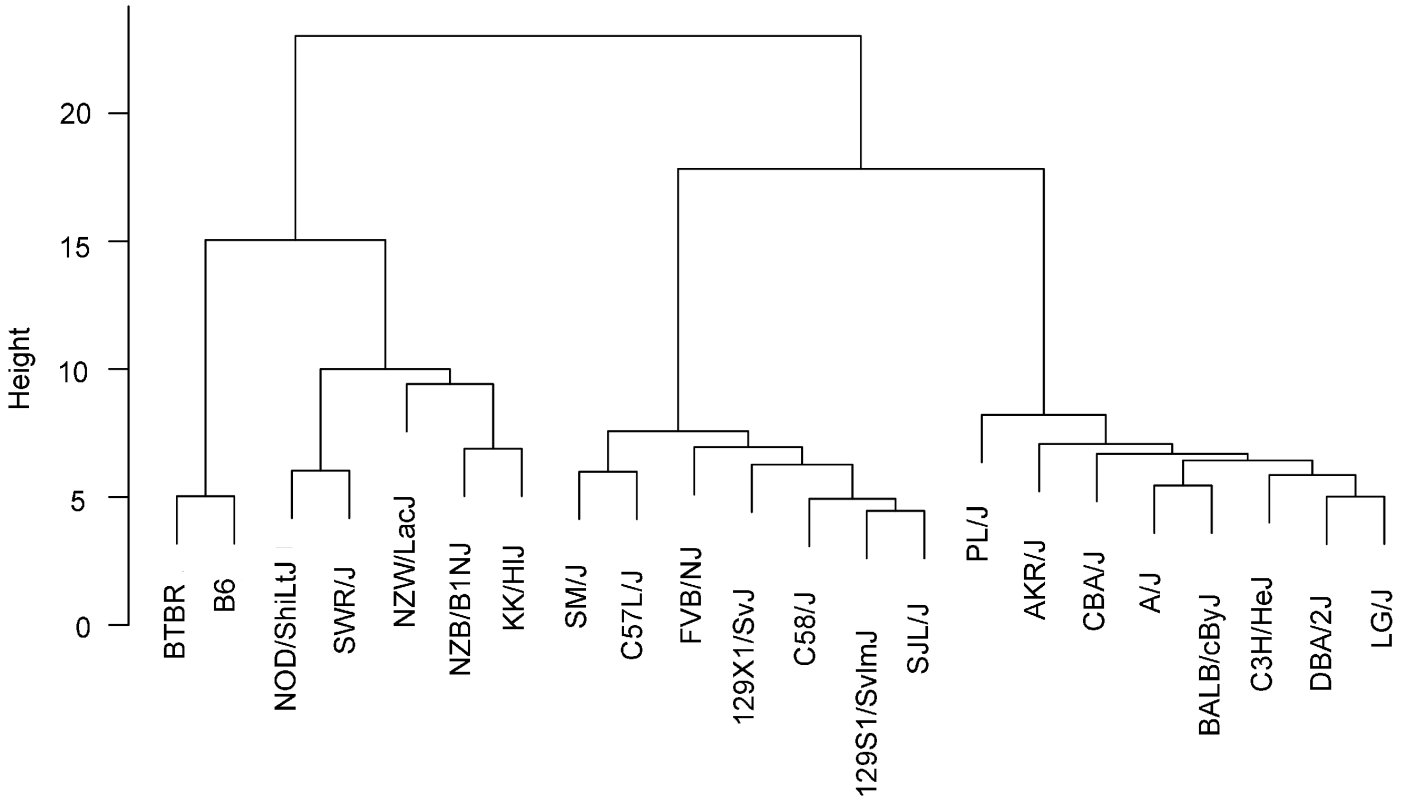

Nkrp1 region

B

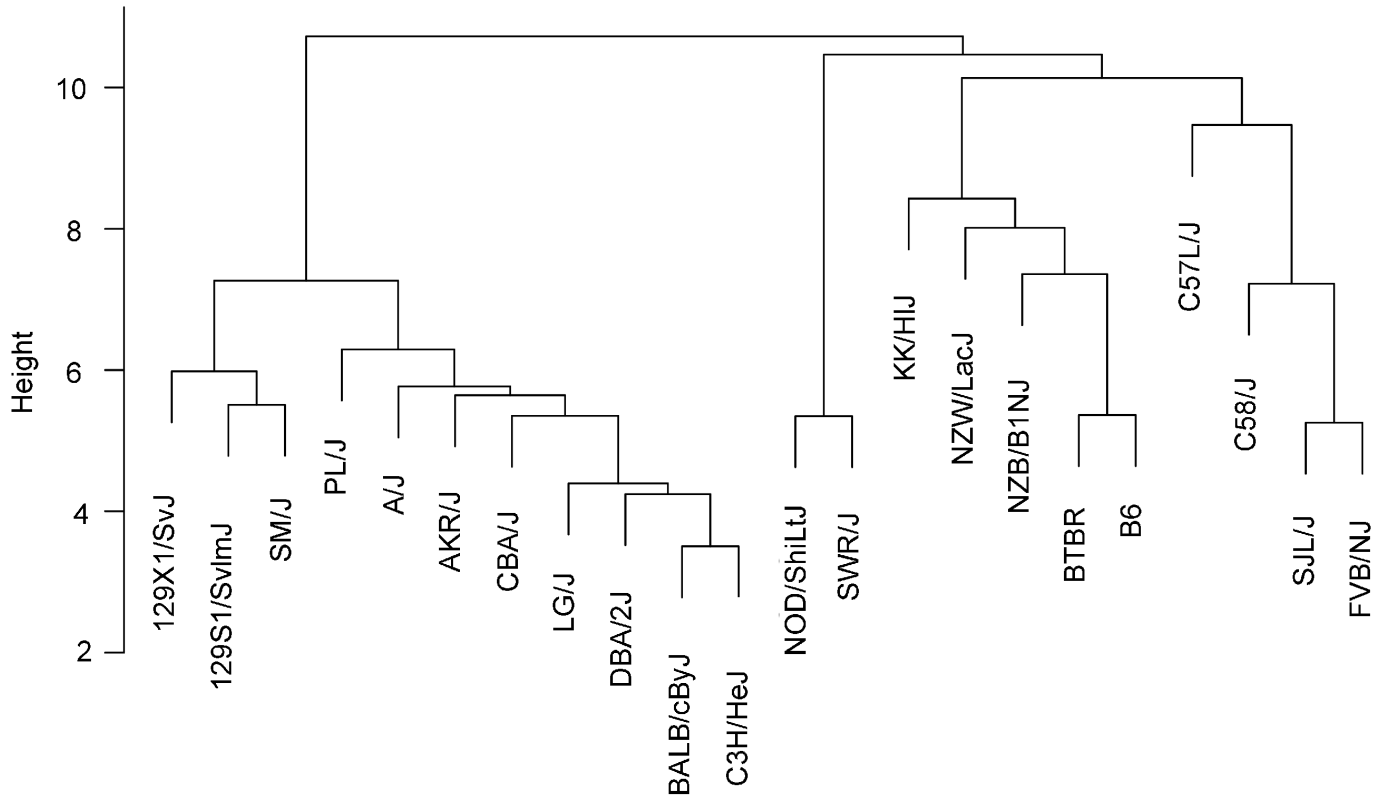

Supplement: NIHMS215228-supplement-8.pdf [file NIHMS215228-supplement-8.pdf]
